# Supplementary material for: Diverse mixing state and ice nucleation properties of aerosol particles over the Western Pacific and the Southern Ocean
Source: Copernicus journal article supplement (doi:10.5194/egusphere-2023-2646), 2023-11-13
Supplement: Supplementary file 1 [file egusphere-2023-2646-supplement.pdf]

1 **Supplemental information**

2  
3 **Diverse mixing state and ice nucleation properties of aerosol particles over the**  
4 **Western Pacific and the Southern Ocean**

5  
6 Jiao Xue<sup>1</sup>, Tian Zhang<sup>1</sup>, Keyhong Park<sup>2</sup>, Jinpei Yan<sup>3</sup>, Young Jun Yoon<sup>2</sup>, Jiyeon Park<sup>2,\*</sup>, Bingbing  
7 Wang<sup>1,4,\*</sup>

8  
9 <sup>1</sup> State Key Laboratory of Marine Environmental Science, College of Ocean and Earth Sciences,  
10 Xiamen University, Xiamen, 361102 China

11 <sup>2</sup> Korea Polar Research Institute, Incheon, 21990 South Korea

12 <sup>3</sup> Third Institute of Oceanography, Ministry of Natural Resources, Xiamen 361005, China

13 <sup>4</sup> Center for Marine Meteorology and Climate Change, Xiamen University, Xiamen, 361102  
14 China

15  
16  
17 *\*Correspondence:* Bingbing Wang (Bingbing.Wang@xmu.edu.cn) and Jiyeon Park  
18 (jypark@kopri.re.kr).

32 **Table S1.** Information for the particle samples collected aboard the R/V *Araon* including the collecting date,  
 33 time, and location; collection time (sampling duration); the mean values (average) of air temperature, relative  
 34 humidity (RH), air pressure, black carbon (BC) concentration and relative wind speed; and the range of relative  
 35 wind direction. The number of particles examined by CCSEM/EDX were listed and the samples used for ice  
 36 nucleation experiments were marked.

| Region | Samples ID  | Collecting start time (UTC) | Collecting end time (UTC) | Collection n Time (mins) | Collecting start location (latitude, longitude) | Collecting end location (latitude, longitude) | Average air temperature (°C) | Average RH (%) | Average Pressure (hPa) | Average relative wind speed (m/s) | Relative wind direction range (°) | Average BC concentration (µg/m <sup>3</sup> ) | Number of particles examined by CCSEM | Ice nucleation experiment |
|--------|-------------|-----------------------------|---------------------------|--------------------------|-------------------------------------------------|-----------------------------------------------|------------------------------|----------------|------------------------|-----------------------------------|-----------------------------------|-----------------------------------------------|---------------------------------------|---------------------------|
| WP-I   | S1          | 11/01 19:19                 | 11/01 19:29               | 10                       | 34.96° N, 125.61° E                             | 34.95° N, 125.61° E                           | 18.6±0.0                     | 85.5±0.2       | 1017.6±0.0             | 0.71±0.3                          | 68 - 75                           | 1963.3±42.0                                   | 1270                                  | ✓                         |
|        | S2          | 11/01 20:57                 | 11/01 21:07               | 10                       | 30.29° N, 128.67° E                             | 30.26° N, 128.69° E                           | 22.4±0.1                     | 56.4±1.6       | 1014.1±0.0             | 0.98±0.3                          | 357 - 9                           | 217.0±127.5                                   | 910                                   |                           |
|        | S3          | 11/02 21:52                 | 11/02 22:02               | 10                       | 25.59° N, 131.56° E                             | 25.57° N, 131.57° E                           | 26.5±0.0                     | 80.3±0.5       | 1009.8±0.1             | 1.41±0.1                          | 337 - 342                         | 189.8±174.2                                   | 1002                                  |                           |
|        | S4          | 11/03 21:06                 | 11/03 21:16               | 10                       | 21.90° N, 134.75° E                             | 21.87° N, 134.77° E                           | 27.7±0.0                     | 80.2±0.2       | 1007.9±0.0             | 1.24±0.2                          | 355 - 358                         | 9.2±0.8                                       | 914                                   | ✓                         |
|        | S5          | 11/03 21:33                 | 11/04 01:33               | 240                      | 21.83° N, 134.81° E                             | 21.12° N, 135.28° E                           | 28.0±0.2                     | 77.0±2.6       | 1007.1±0.2             | 1.0±0.4                           | 337 - 4                           | 25.9±15.4                                     | 1191                                  |                           |
|        | S6          | 11/04 23:14                 | 11/05 03:14               | 240                      | 17.23° N, 137.58° E                             | 16.40° N, 138.29° E                           | 28.6±0.4                     | 80.2±2.2       | 1001.3±0.8             | 1.12±1.6                          | 305 - 325                         | 35.9±46.4                                     | 928                                   |                           |
|        | S7          | 11/05 23:48                 | 11/06 03:48               | 240                      | 13.03° N, 141.09° E                             | 12.36° N, 141.56° E                           | 28.8±0.2                     | 77.9±1.5       | 1000.4±0.8             | 0.59±0.5                          | 346 - 22                          | 22.2±30.3                                     | 908                                   |                           |
|        | S8          | 11/08 02:01                 | 11/08 06:07               | 246                      | 04.26° N, 147.22° E                             | 03.45° N, 147.54° E                           | 29.3±0.1                     | 76.5±2.0       | 1003.4±0.5             | 1.34±1.5                          | 67 - 80                           | 107.4±70.6                                    | 1247                                  |                           |
|        | S9          | 11/08 08:00                 | 11/08 12:00               | 240                      | 03.25° N, 148.09° E                             | 02.43° N, 148.42° E                           | 29.2±0.1                     | 80.4±1.9       | 1005.2±0.7             | 10.7±0.7                          | 11 - 67                           | 50.3±31.5                                     | 1064                                  | ✓                         |
|        | S10         | 11/08 13:00                 | 11/08 17:00               | 240                      | 02.32° N, 148.50° E                             | 01.51° N, 149.22° E                           | 28.8±0.1                     | 81.5±1.6       | 1004.9±0.6             | 0.72±1.7                          | 347 - 20                          | 17.6±13.3                                     | 986                                   |                           |
|        | S11         | 11/10 05:31                 | 11/10 10:04               | 273                      | 04.45° S, 154.02° E                             | 05.46° S, 154.12° E                           | 28.1±0.3                     | 79.4±2.9       | 1005.0±0.8             | 0.81±1.6                          | 326 - 10                          | 26.3±29.8                                     | 1075                                  | ✓                         |
|        | S12         | 11/11 05:04                 | 11/11 09:04               | 240                      | 09.12° S, 155.36° E                             | 10.02° S, 156.02° E                           | 28.2±0.5                     | 72.8±5.6       | 1005.1±0.8             | 16.9±0.7                          | 359 - 15                          | 60.9±47.1                                     | 1409                                  | ✓                         |
|        | S13         | 11/12 05:01                 | 11/12 09:01               | 240                      | 13.30° S, 157.55° E                             | 14.11° S, 158.17° E                           | 27.3±0.1                     | 68.1±1.5       | 1007.1±0.9             | 1.64±0.4                          | 353 - 5                           | 161.5±50.1                                    | 979                                   |                           |
|        | S14         | 11/13 03:47                 | 11/13 07:49               | 242                      | 17.19° S, 160.01° E                             | 18.02° S, 160.25° E                           | 25.7±0.1                     | 64.3±1.4       | 1007.8±0.4             | 1.36±0.3                          | 352 - 3                           | 67.47±59.3                                    | 966                                   | ✓                         |
| S15    | 11/14 03:38 | 11/14 07:38                 | 240                       | 20.59° S, 162.04° E      | 21.47° S, 162.21° E                             | 23.5±0.1                                      | 62.6±1.2                     | 1009.5±0.4     | 1.22±0.4               | 1 - 22                            | 356.8±122.9                       | 1483                                          |                                       |                           |
| S16    | 11/14 20:39 | 11/15 00:39                 | 240                       | 24.29° S, 163.03° E      | 25.20° S, 163.12° E                             | 22.1±0.1                                      | 74.1±0.8                     | 1013.0±0.2     | 0.77±1.2               | 331 - 353                         | 31.1±20.0                         | 1027                                          |                                       |                           |
| SO     | S17         | 11/17 19:31                 | 11/17 23:31               | 240                      | 37.13° S, 169.01° E                             | 37.52° S, 169.39° E                           | 14.7±0.7                     | 78.7±4.7       | 1008.2±0.2             | 0.99±2.9                          | 69 - 112                          | 30.4±31.5                                     | 730                                   |                           |
|        | S18         | 11/28 19:15                 | 11/28 23:15               | 240                      | 61.33° S, 174.10° W                             | 62.17° S, 173.58° W                           | 1.7±0.5                      | 97.9±0.3       | 982.9±0.2              | 11.8±2.5                          | 26 - 344                          | 52.1±81.2                                     | 666                                   |                           |
|        | S19         | 11/29 07:28                 | 11/29 11:28               | 240                      | 63.52° S, 173.16° W                             | 64.38° S, 172.58° W                           | -0.9±0.2                     | 93.8±0.7       | 966.8±7.3              | 17.9±1.4                          | 325 - 341                         | 65.6±106.6                                    | 794                                   |                           |
|        | S20         | 11/29 19:43                 | 11/29 23:43               | 240                      | 66.14° S, 172.17° W                             | 66.55° S, 171.59° W                           | -3.5±0.1                     | 88.1±1.6       | 973.5±5.7              | 1.33±1.4                          | 323 - 11                          | 4.4±5.6                                       | 1011                                  | ✓                         |
|        | S21         | 12/01 04:26                 | 12/01 10:30               | 364                      | 71.18° S, 171.49° W                             | 72.04° S, 172.07° W                           | -4.6±0.4                     | 80.9±6.9       | 992.0±1.3              | 0.78±0.7                          | 3 - 356                           | 36.3±6.0                                      | 992                                   |                           |
|        | S22         | 12/02 05:46                 | 12/02 11:47               | 361                      | 73.26° S, 176.20° W                             | 74.21° S, 178.58° E                           | -4.2±1.1                     | 81.9±14.4      | 990.7±14.0             | 0.93±5.2                          | 19 - 61                           | 17.0±88.4                                     | 924                                   |                           |
|        | S23         | 12/02 16:00                 | 12/02 22:02               | 362                      | 74.07° S, 177.09° W                             | 75.12° S, 173.34° E                           | -2.2±0.3                     | 75.8±2.8       | 984.1±1.0              | 1.32±2.4                          | 349 - 49                          | 3.5±20.2                                      | 978                                   |                           |
|        | S24         | 12/03 01:55                 | 12/03 07:53               | 358                      | 75.08° S, 171.07° E                             | 74.55° S, 166.26° E                           | -2.3±0.2                     | 69.1±0.2       | 965.9±0.7              | 1.56±1.7                          | 8 - 67                            | 59.2±28.3                                     | 638                                   |                           |
|        | S25         | 12/08 21:18                 | 12/09 03:21               | 363                      | 74.43° S, 164.49° E                             | 74.59° S, 169.33° E                           | -2.7±0.2                     | 79.2±2.1       | 993.4±0.3              | 0.75±1.1                          | 7 - 359                           | 14.9±20.4                                     | 861                                   |                           |
|        | S26         | 12/09 08:26                 | 12/09 14:26               | 360                      | 74.57° S, 173.14° E                             | 74.18° S, 177.20° E                           | -3.2±0.7                     | 79.6±3.4       | 990.4±0.7              | 1.10±2.6                          | 305 - 331                         | 25.4±36.9                                     | 944                                   |                           |
|        | S27         | 12/09 19:48                 | 12/10 01:49               | 361                      | 73.42° S, 179.06° W                             | 73.07° S, 175.26° W                           | -4.3±0.4                     | 85.7±3.9       | 992.7±0.5              | 0.90±2.4                          | 344 - 36                          | 14.5±24.5                                     | 928                                   | ✓                         |
|        | S28         | 12/10 19:58                 | 12/11 01:58               | 362                      | 70.39° S, 171.00° W                             | 69.34° S, 171.11° W                           | -4.1±0.1                     | 68.6±2.9       | 993.9±1.0              | 1.23±1.8                          | 19 - 108                          | 38.7±21.5                                     | 922                                   |                           |
|        | S29         | 12/11 20:03                 | 12/12 02:03               | 360                      | 66.59° S, 178.24° W                             | 66.24° S, 179.52° E                           | -0.3±0.4                     | 98.6±6.0       | 980.2±9.4              | 11.8±1.9                          | 0 - 359                           | 36.3±62.4                                     | 814                                   |                           |

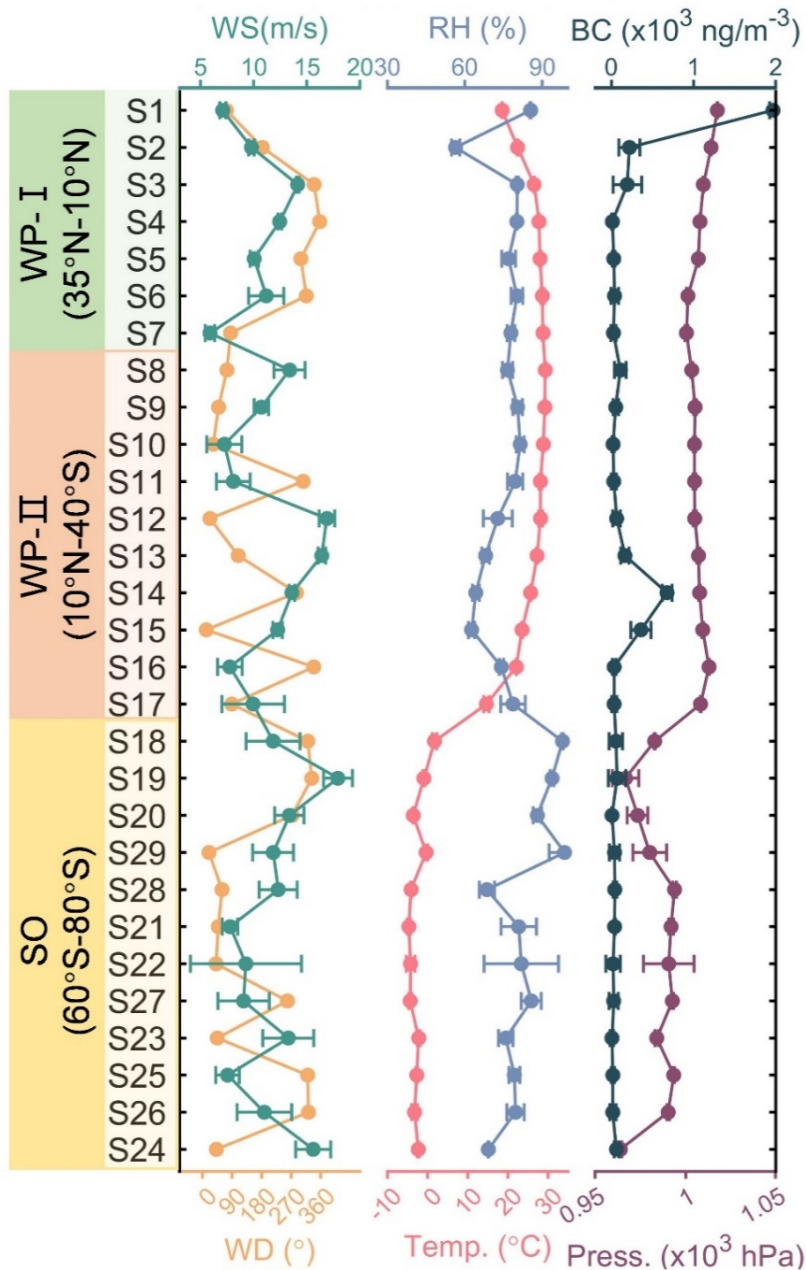

38  
 39 **Figure S1.** Meteorological data and BC concentrations for all samples. Mean values with one standard deviation  
 40 for the relative wind speed (WS), relative wind direction (WD), air temperature (Temp.), RH, pressure (Press.),  
 41 and BC concentration. Samples of S1 – S7, S8 – S17, and S18 – S24 were located in 35°N – 10°N, 10°N – 40°S,  
 42 and 60°S – 80°S regions, respectively.

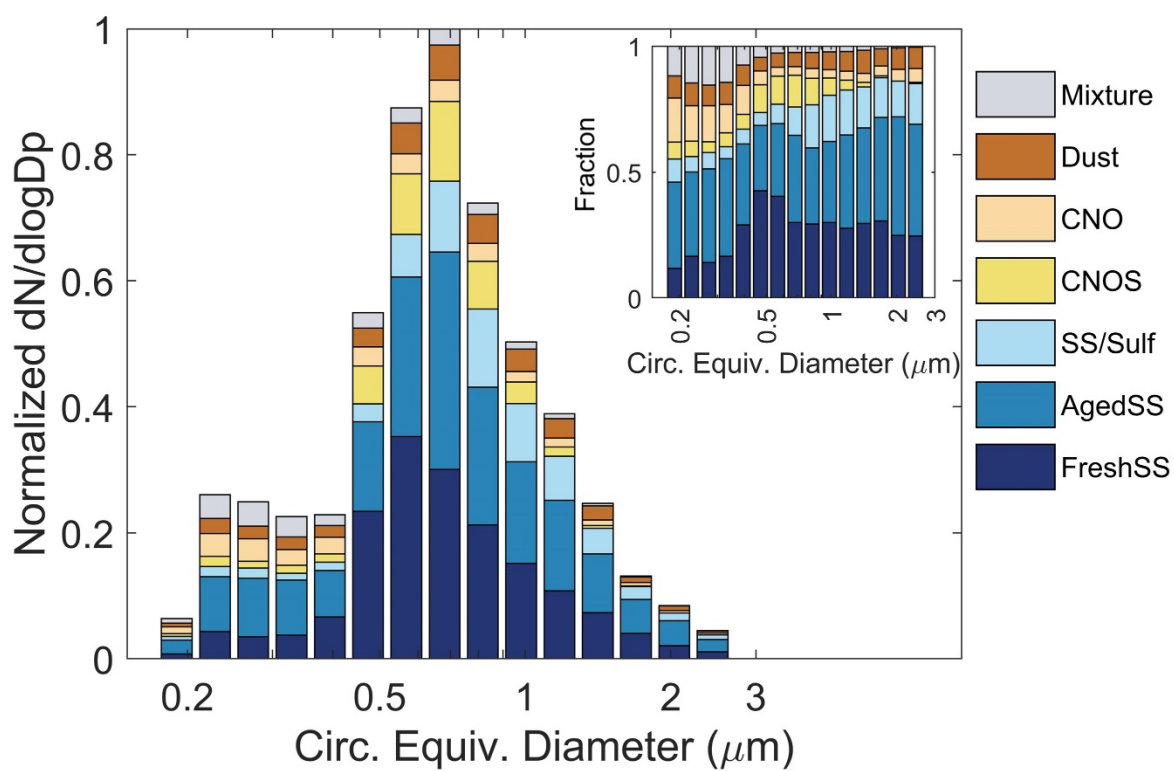

43

44 **Figure S2.** The size distribution of all types of particles for all samples. The inset plot shows the fractions of all  
 45 types of particles.

46

47

48

49

50



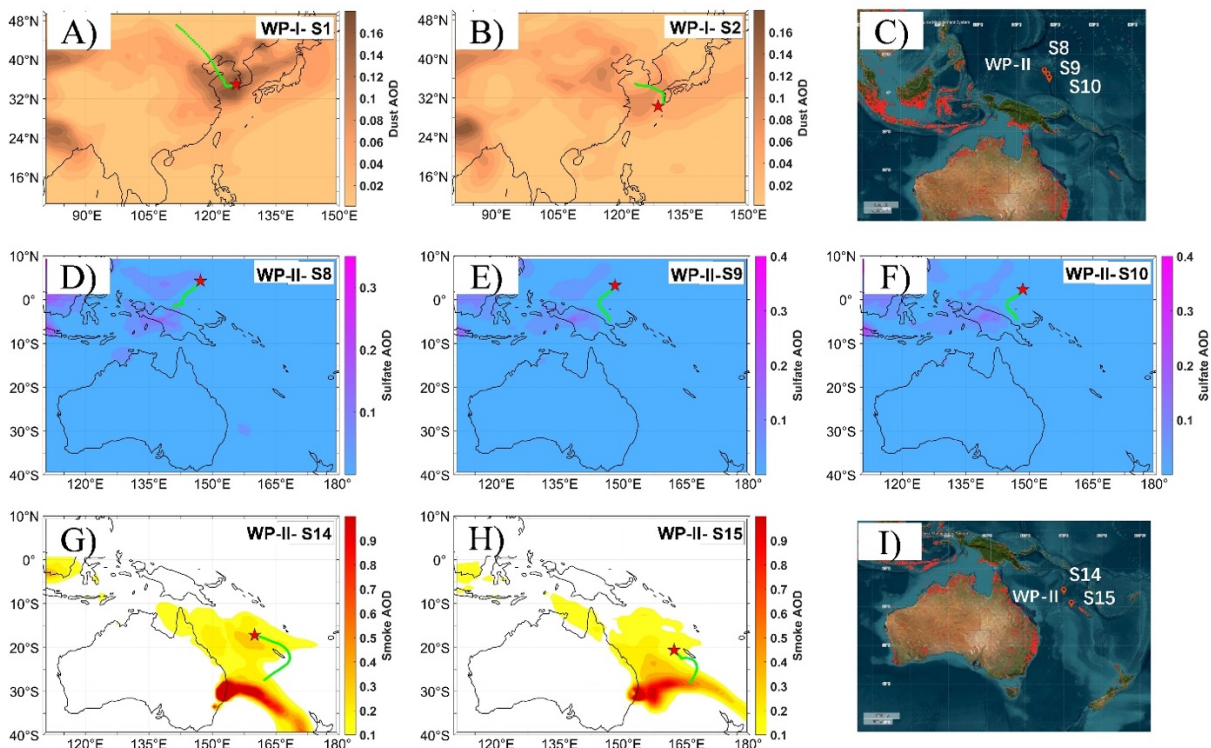

51  
 52 **Figure S3.** Aerosol optical depth (AOD) of dust (A and B), sulfates (D – F), and smoke (G and H) produced by  
 53 Navy Aerosol Analysis and Prediction System reanalysis (NAAPS-RA, at 550nm) overlaid with HYSPLIT 72h  
 54 backward trajectories (green line). (C) and (I) are the accumulated fire spots from Nov. 2nd to Nov. 8<sup>th</sup>, 2019  
 55 and from Nov. 8<sup>th</sup> to 14<sup>th</sup>, 2019, respectively, from Fire Information for Resource Management System (FIRMS).  
 56 Sample labels are shown on the top right of each panel.

57

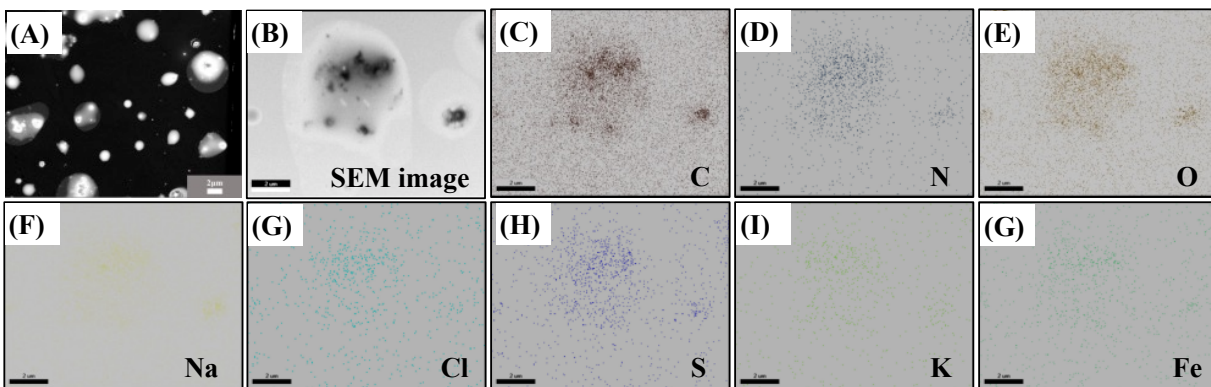

58  
 59 **Figure S4.** SEM images (A and B) and EDX elemental maps (C – G) indicate the characteristic of BBA particles  
 60 from S14 sample. (A) SEM image of a larger field was captured on the darkfield mode using scanning  
 61 transmission electron microscopy (STEM) detector. (B) SEM image of a smaller field for chemical mapping (C  
 62 – G) by collecting EDX signals. Intense carbon signals within the particle (B) indicated high density of carbon  
 63 inclusions which likely are aged soot. The scale bar for all images is 2 μm.

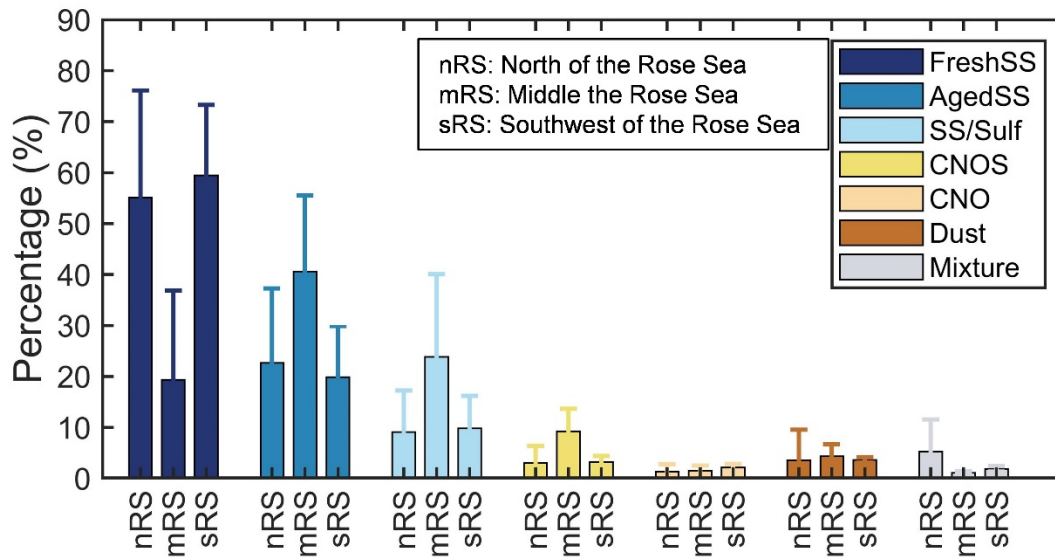

65

66

67 **Figure S5.** The average number percentages of all particle classes for samples that were collected in the middle  
 68 of Rose Sea (S28, S21, S22, S27, and S23), the north part of Rose Sea (S18, S19, S20, and S29), and the  
 69 southwest part of Rose Sea (S25, S26, and S24).

70

71

72

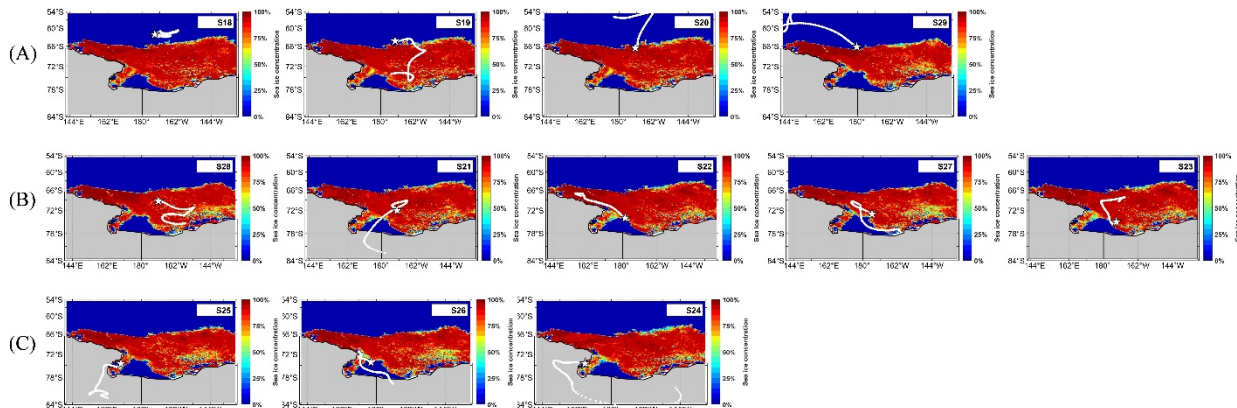

73

74 **Figure S6** Sea ice concentration over the third sample region (SO) (data retrieved from [https://seaice.uni-](https://seaice.uni-bremen.de/sea-ice-concentration/amsre-amsr2/)  
 75 [bremen.de/sea-ice-concentration/amsre-amsr2/](https://seaice.uni-bremen.de/sea-ice-concentration/amsre-amsr2/)) overlaid with HYSPLIT 120 h backward trajectories (white  
 76 lines). The stars represent the sampling locations. The sample number is showed in the upper right corner of  
 77 each panel. (A) north of the Rose Sea (S18, S19, S20, and S29), (B) middle of the Rose Sea (S28, S21, S22, S27,  
 78 and S23), (C) southwest of the Rose Sea (S25, S26, and S24).

79

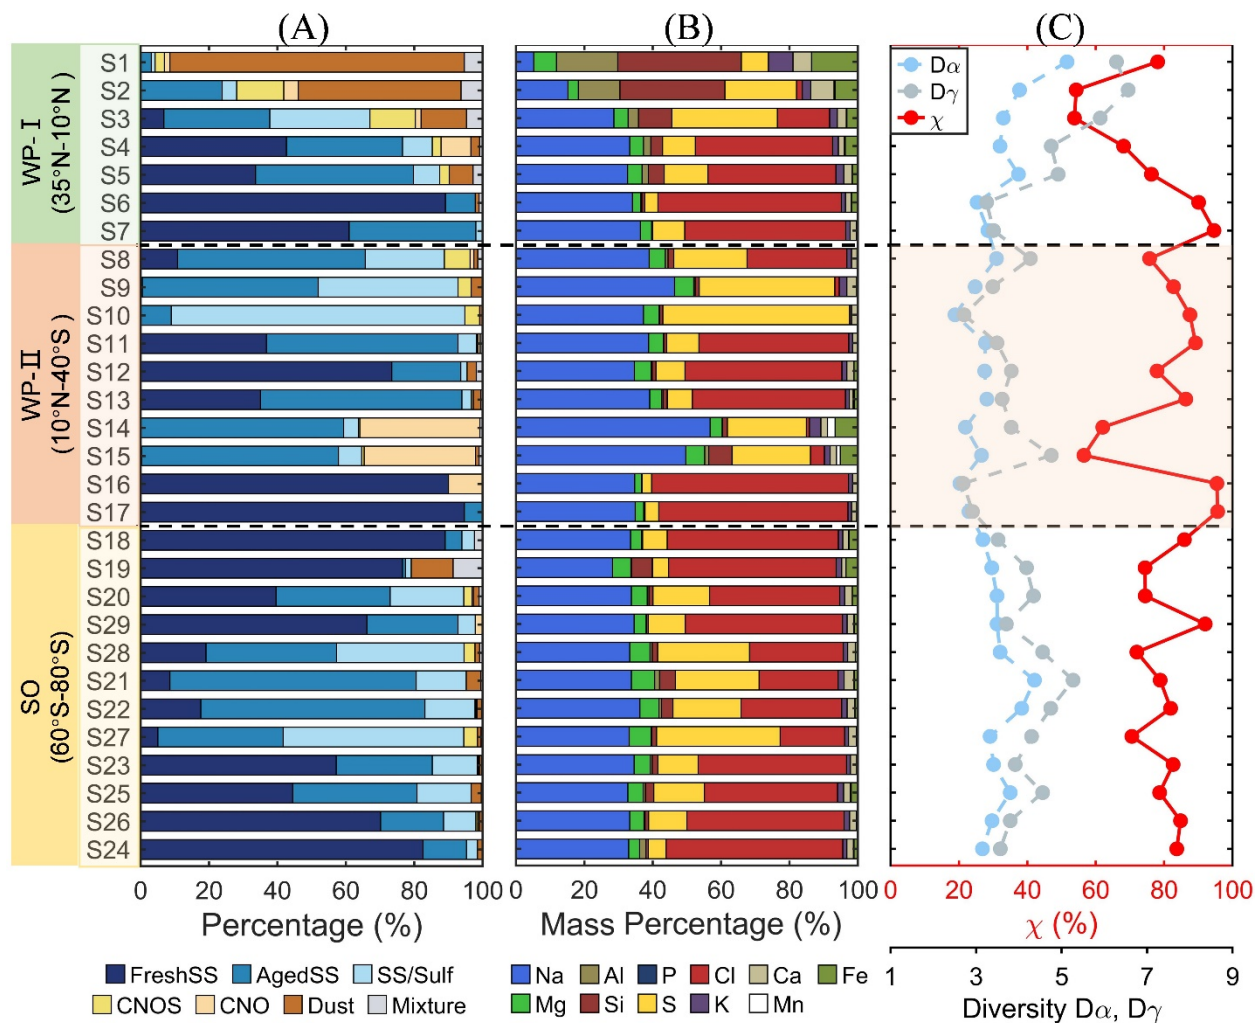

80

81 **Figure S7.** The number percentages of different particle classes (A), mass percentages of elements (B), and  
 82 mixing state (C) of super-micron particles (diameter > 1 μm). Light blue, gray, and red points represent the  
 83 average particle elemental diversity ( $D_\alpha$ ), bulk population elemental diversity ( $D_\gamma$ ), and mixing state index ( $\chi$ ),  
 84 respectively.

85

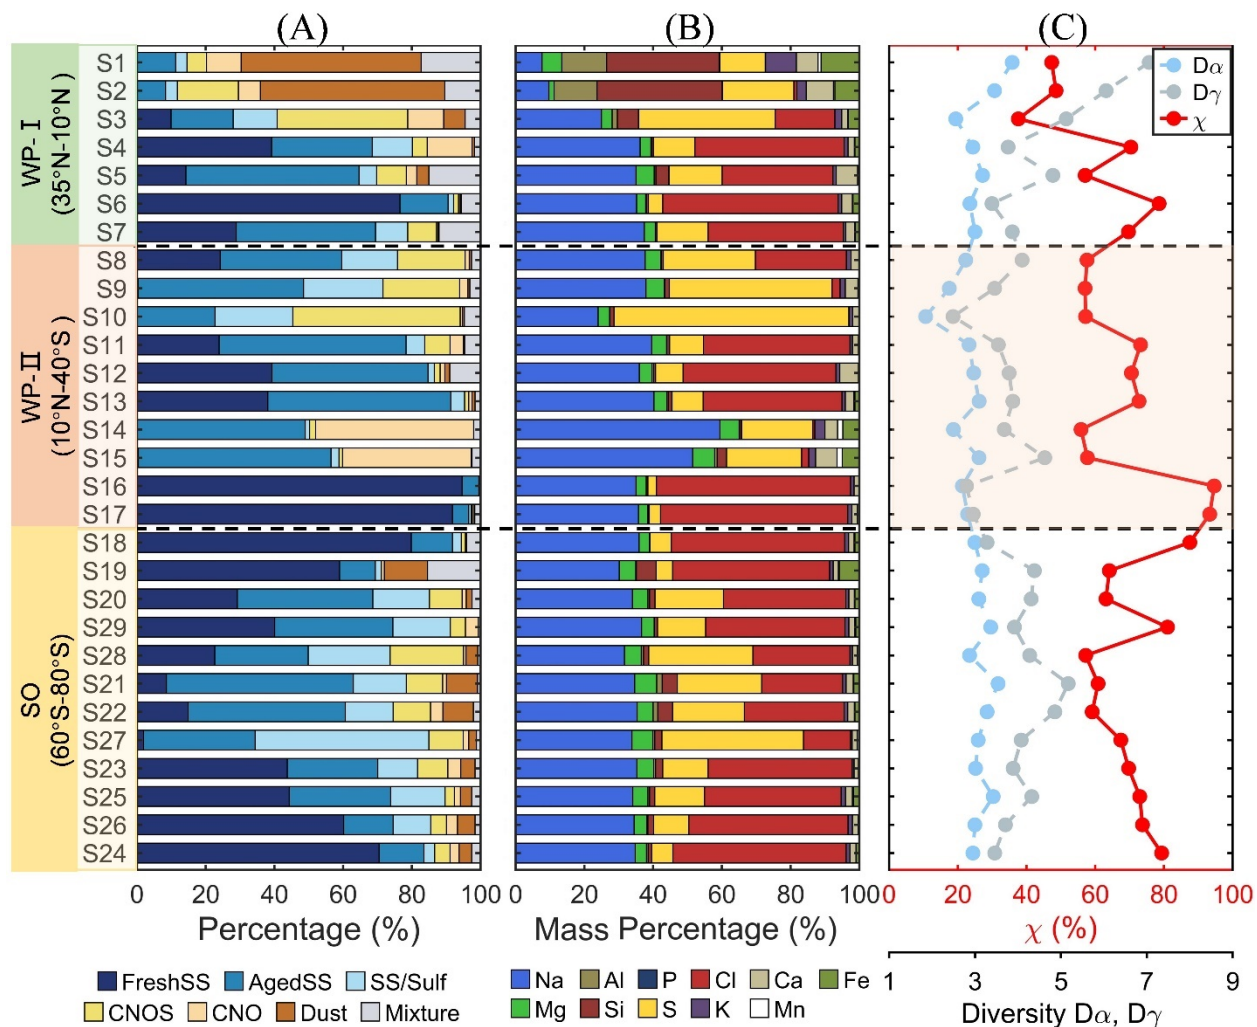

86  
 87 **Figure S8.** The number percentages of different particle classes (A), mass percentages of elements (B), and  
 88 mixing state (C) of sub-micron particles (diameter between 0.2 and 1  $\mu\text{m}$ ). The light blue, gray, and red points  
 89 represent  $D_\alpha$ ,  $D_\gamma$ , and  $\chi$ , respectively.



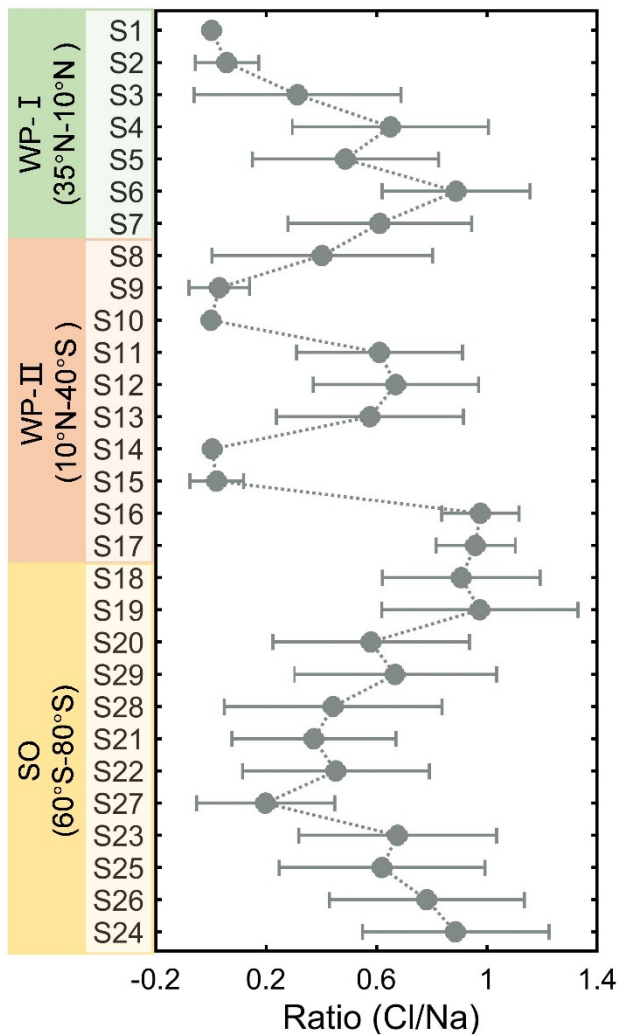

90

91 **Figure S9.** The ratio of chlorine to sodium in FreshSS, AgedSS and SS/Sulf particles. The data are mean value

92

with one standard deviation.

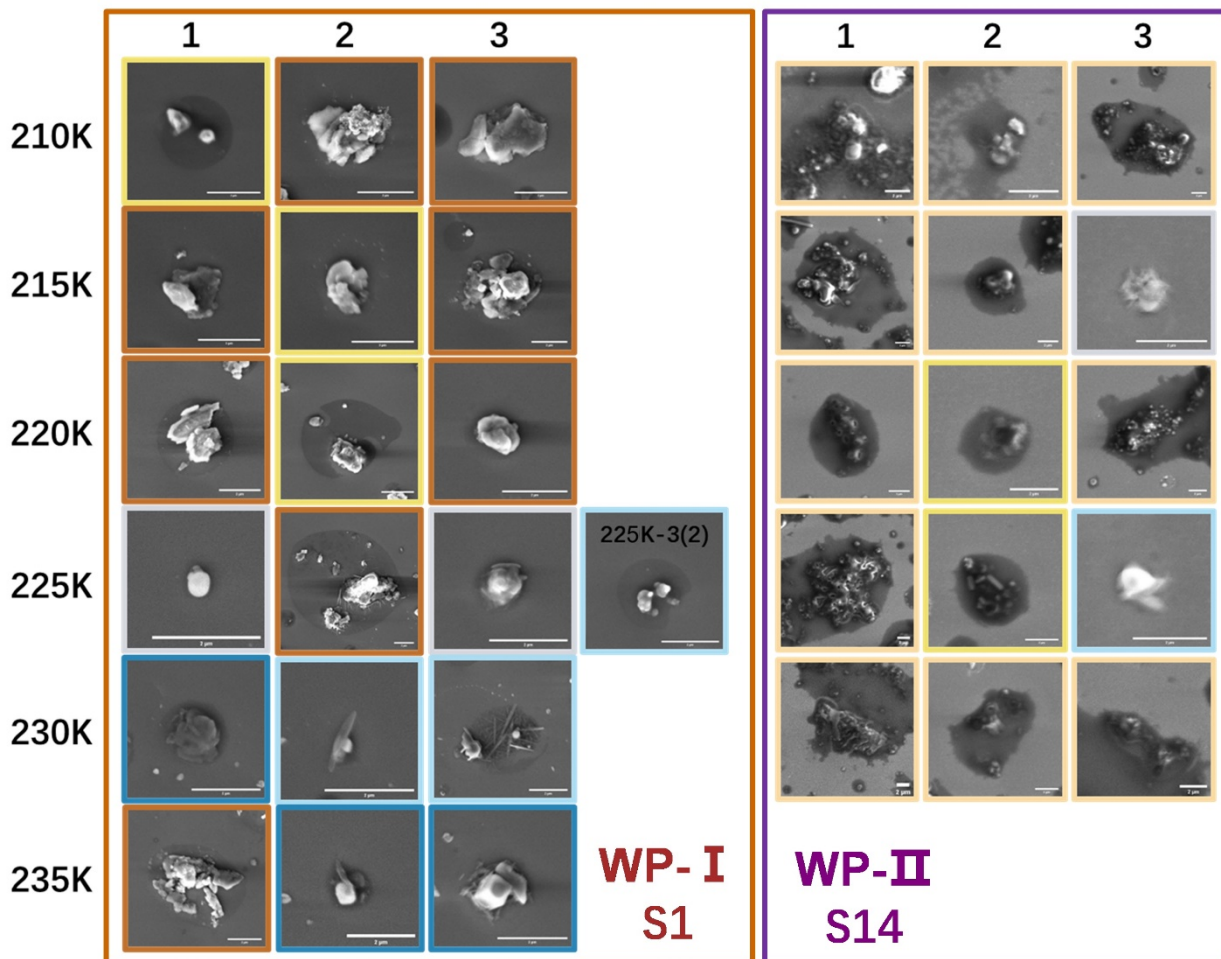

93  
 94 **Figure S10.** SEM images of INPs identified at different freezing temperatures for the Dust dominated samples  
 95 (S1) and BBA influenced samples (S14). The frame color of images represents the types of INPs and use the  
 96 same color codes in Figure 2. Blue, light blue, yellow, light orange, brown, and gray represent the FreshSS,  
 97 AgedSS, SS/Sulf, CNOS, CNO, Dust, and Mixture particle class, respectively. The number on top represents  
 98 the sequence of ice nucleation experiments. The number on the SEM image indicates the temperature and number  
 99 of INPs at the onset conditions. For example, the label “225K-3(2)” means this is the second INPs nucleated ice  
 100 at the same  $RH_{ice}$  for the 3<sup>rd</sup> ice nucleation experiment at 225 K. The scale bar for all images is 2 $\mu$ m.

101

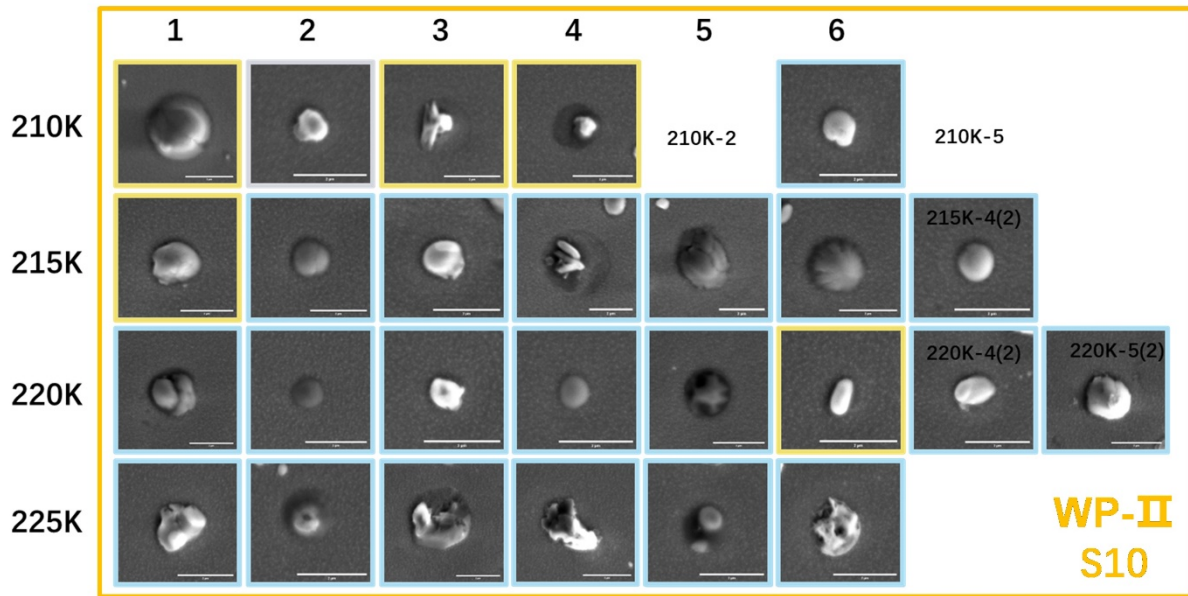

102

103 **Figure S11.** SEM images of INPs identified at different freezing temperatures for the CNOS and SS/Sulf  
 104 dominated samples (S10). The label without SEM image indicates the same INP nucleated ice at a different ice  
 105 nucleation experiment at the same temperature. For example, the lable “210K-2” means at the fifth ice nucleation  
 106 experiment the INP is the same as the second run at 210 K. Other descriptions of the labels are the same as in  
 107 Figure S9. The scale bar for all images is 2  $\mu\text{m}$ .

108

109

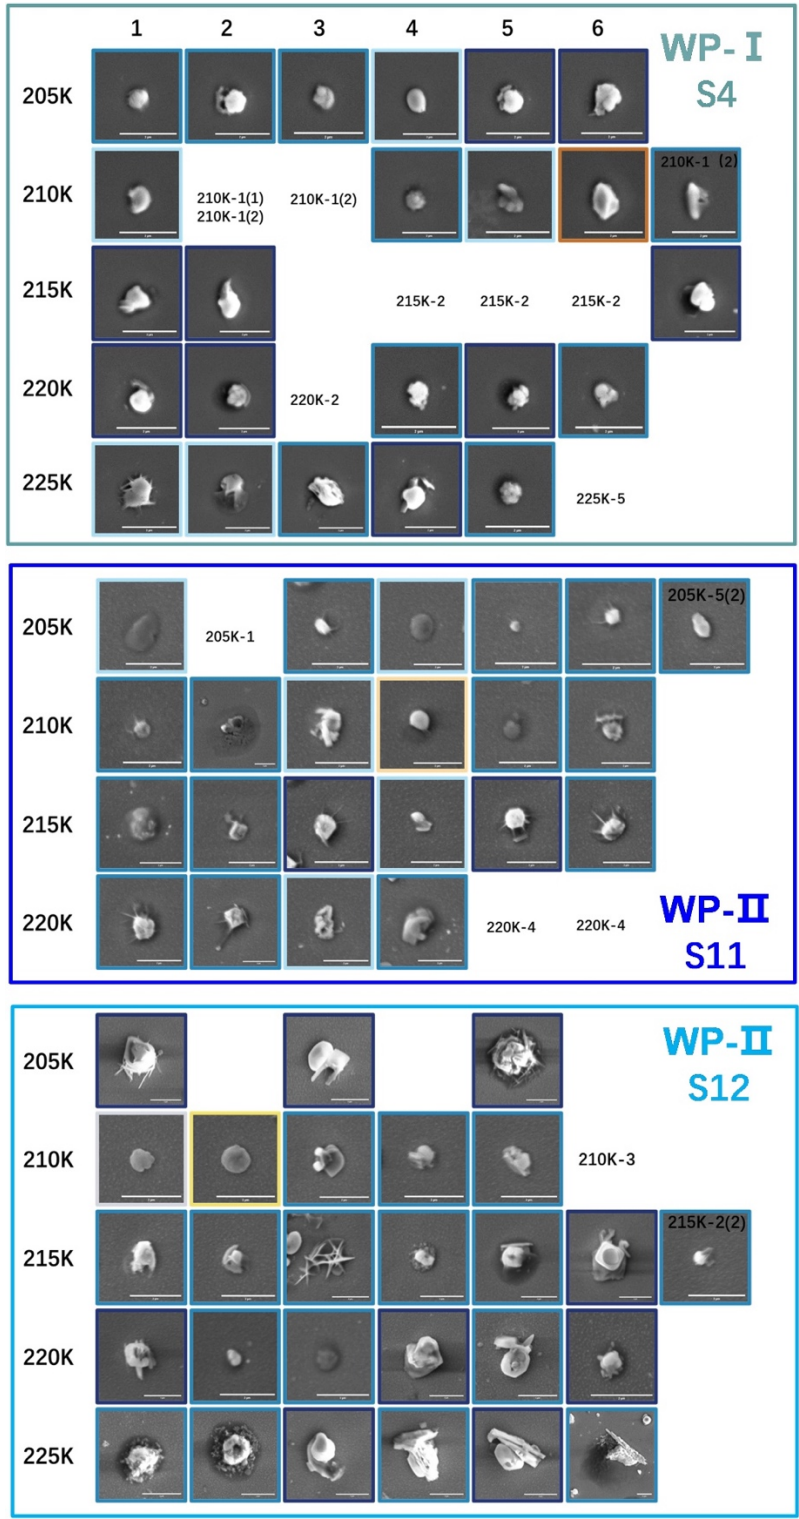

110

111 **Figure S12.** SEM images of INPs identified at different freezing temperatures for the FreshSS and AgedSS  
 112 dominated samples (S4, S11, and S12). Other descriptions of the labels are the same as in Figure S9 and Figure  
 113 S10. The scale bar for all images is 2  $\mu\text{m}$ .

114



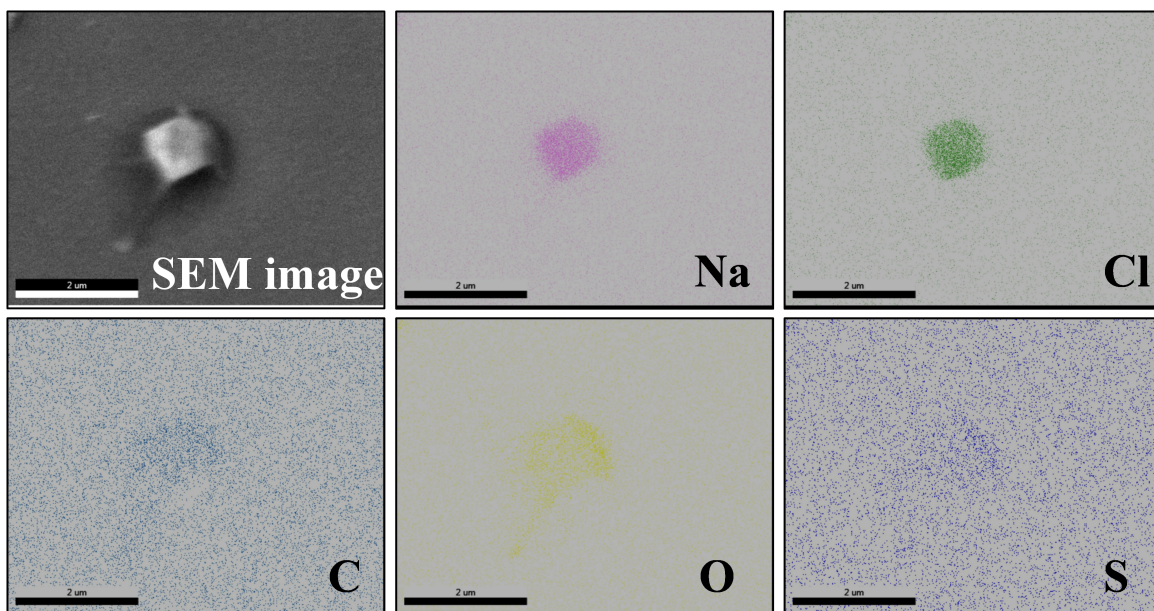

115  
 116 **Figure S13.** SEM image and EDX elemental maps for a typical AgedSS particle from S11 samples. The scale  
 117 bar is 2  $\mu\text{m}$  for all images.

118  
 119  
 120  
 121

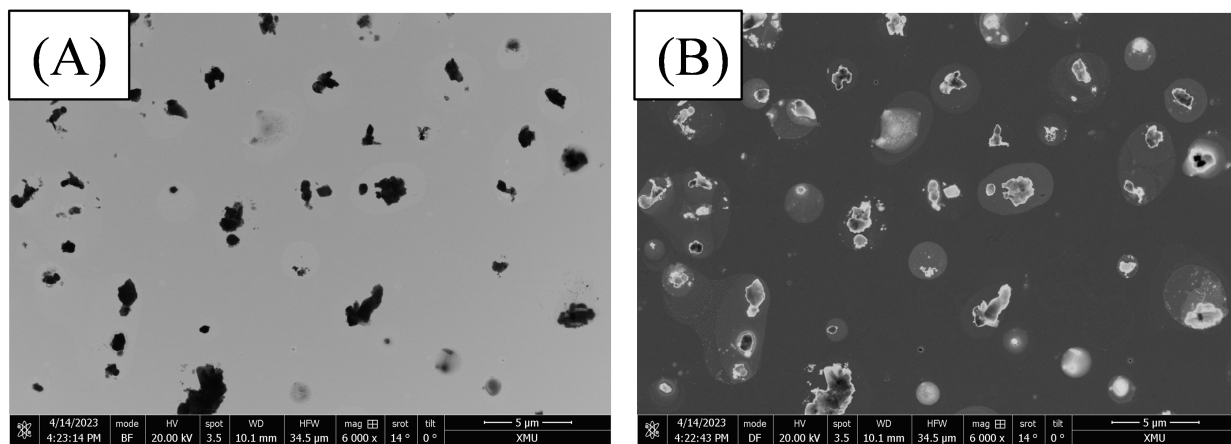

122  
 123 **Figure S14.** The SEM images of particles from S1 sample using scanning transmission electron microscopy  
 124 (STEM) detector. (A) on the bright field mode, (B) on the dark field mode. The scale bar is 5  $\mu\text{m}$ .

125  
 126  
 127  
 128

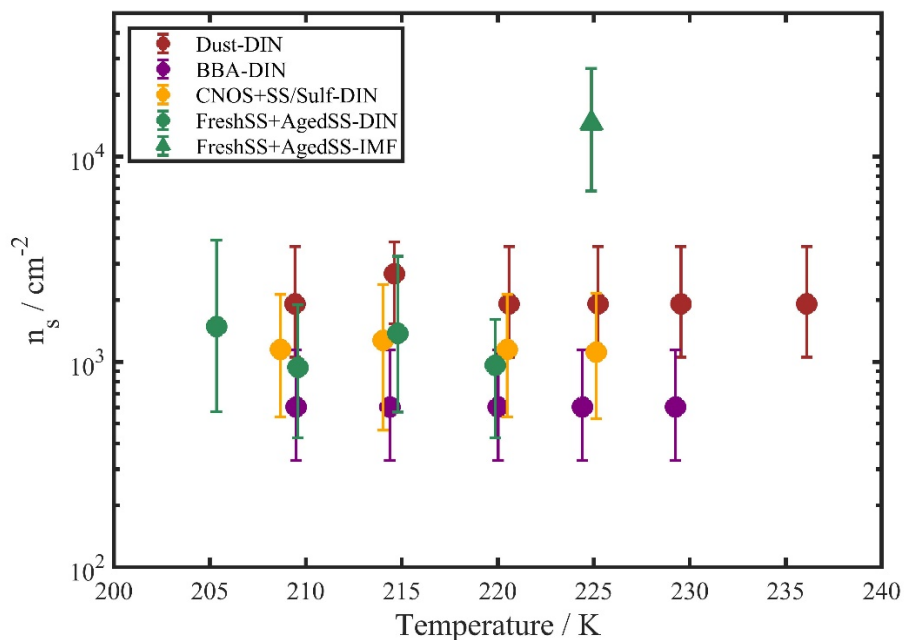

129  
 130 **Figure S15** Median  $n_s$  with 25<sup>th</sup> and 75<sup>th</sup> percentiles for all types of samples. Circles represent DIN and triangles  
 131 represent IMF. Brown, purple, orange, and green symbols represent Dust, BBA, CNOS and SS/Sulf, FreshSS  
 132 and AgedSS dominated samples, respectively.

133  
 134  
 135  
 136  
 137  
 138  
 139  
 140  
 141  
 142  
 143  
 144  
 145  
 146  
 147  
 148  
 149  
 150

151 **Table S2.** Enrichment factors for different types of INPs. The lower and upper limits of EFs were calculated by  
 152 Poisson distribution at 95% confidence level.

| EF        | FrehsSS                              | AgedSS                               | SS/Sulf                               | CNOS                                  | CNO                                   | Dust                                  | Mixture                              | Aging process                        |
|-----------|--------------------------------------|--------------------------------------|---------------------------------------|---------------------------------------|---------------------------------------|---------------------------------------|--------------------------------------|--------------------------------------|
| WP-I-S1   | \                                    | 0.89 <sup>2.29</sup> <sub>0.24</sub> | 2.53 <sup>6.53</sup> <sub>0.69</sub>  | 1.09 <sup>2.83</sup> <sub>0.30</sub>  | 0.00 <sup>1.64</sup> <sub>0.00</sub>  | 1.48 <sup>2.68</sup> <sub>0.74</sub>  | 0.45 <sup>1.41</sup> <sub>0.08</sub> | 1.31 <sup>2.59</sup> <sub>0.57</sub> |
| WP-II-S14 | \                                    | 0.00 <sup>1.03</sup> <sub>0.00</sub> | 2.75 <sup>13.05</sup> <sub>0.14</sub> | 1.57 <sup>4.95</sup> <sub>0.28</sub>  | 1.34 <sup>2.23</sup> <sub>0.75</sub>  | 0.00 <sup>16.48</sup> <sub>0.00</sub> | 0.48 <sup>2.27</sup> <sub>0.02</sub> | 0.31 <sup>1.45</sup> <sub>0.02</sub> |
| WP-II-S10 | \                                    | 0.00 <sup>1.59</sup> <sub>0.00</sub> | 1.52 <sup>2.21</sup> <sub>1.01</sub>  | 1.03 <sup>2.17</sup> <sub>0.41</sub>  | \                                     | 0.00 <sup>8.35</sup> <sub>0.00</sub>  | 0.17 <sup>0.83</sup> <sub>0.01</sub> | 1.33 <sup>1.93</sup> <sub>0.88</sub> |
| WP-I-S4   | 0.95 <sup>1.66</sup> <sub>0.50</sub> | 0.91 <sup>1.60</sup> <sub>0.48</sub> | 2.72 <sup>5.72</sup> <sub>1.07</sub>  | 0.00 <sup>8.15</sup> <sub>0.00</sub>  | 0.00 <sup>32.58</sup> <sub>0.00</sub> | 2.18 <sup>10.32</sup> <sub>0.11</sub> | 0.00 <sup>1.55</sup> <sub>0.00</sub> | 1.20 <sup>1.87</sup> <sub>0.72</sub> |
| WP-II-S11 | 0.52 <sup>1.63</sup> <sub>0.09</sub> | 1.06 <sup>1.66</sup> <sub>0.64</sub> | 2.17 <sup>4.57</sup> <sub>0.86</sub>  | 0.00 <sup>8.14</sup> <sub>0.00</sub>  | 2.72 <sup>12.88</sup> <sub>0.14</sub> | 0.00 <sup>32.55</sup> <sub>0.00</sub> | 0.00 <sup>1.63</sup> <sub>0.00</sub> | 1.23 <sup>1.80</sup> <sub>0.80</sub> |
| WP-II-S12 | 0.94 <sup>1.65</sup> <sub>0.49</sub> | 1.14 <sup>1.75</sup> <sub>0.70</sub> | 0.00 <sup>2.75</sup> <sub>0.00</sub>  | 5.50 <sup>26.09</sup> <sub>0.28</sub> | 0.00 <sup>32.96</sup> <sub>0.00</sub> | 0.00 <sup>16.48</sup> <sub>0.00</sub> | 0.58 <sup>2.75</sup> <sub>0.03</sub> | 1.05 <sup>1.62</sup> <sub>0.65</sub> |
| All INPs  | 0.88 <sup>5.25</sup> <sub>0.57</sub> | 0.93 <sup>4.95</sup> <sub>0.70</sub> | 1.86 <sup>9.22</sup> <sub>1.24</sub>  | 0.90 <sup>20.12</sup> <sub>0.61</sub> | 1.09 <sup>7.42</sup> <sub>0.66</sub>  | 1.21 <sup>9.92</sup> <sub>0.75</sub>  | 0.28 <sup>2.54</sup> <sub>0.11</sub> | 1.26 <sup>5.84</sup> <sub>0.95</sub> |

Note: ‘\’ indicates that there was no such class in all particles.

153  
 154  
 155  
 156  
 157  
 158  
 159  
 160  
 161  
 162  
 163  
 164  
 165  
 166  
 167  
 168  
 169  
 170  
 171  
 172  
 173  
 174  
 175  
 176  
 177  
 178  
 179  
 180  
 181

182  
183  
184

**Table S3** The  $a$  and  $b$  values in the parameterizations of  $n_s$  for the DIN and IMF,  $n_s = 10^{(a \times T + b)}$ .

| Temperature | Type           | a     | b      |
|-------------|----------------|-------|--------|
| 205K-DIN    | FreshSS+AgedSS | -0.46 | 98.38  |
|             | Dust           | -1.08 | 229.50 |
| 210K-DIN    | BBA            | -0.93 | 197.79 |
|             | CNOS+SS/Sulf   | -0.33 | 72.72  |
|             | FreshSS+AgedSS | -0.45 | 96.37  |
|             | Dust           | -1.89 | 410.07 |
| 215K-DIN    | BBA            | -1.05 | 228.38 |
|             | CNOS+SS/Sulf   | -2.35 | 505.43 |
|             | FreshSS+AgedSS | -0.55 | 121.04 |
|             | Dust           | -0.73 | 163.69 |
| 220K-DIN    | BBA            | -3.34 | 738.29 |
|             | CNOS+SS/Sulf   | -2.65 | 587.31 |
|             | FreshSS+AgedSS | -0.32 | 72.87  |
|             | Dust           | -1.62 | 368.58 |
| 225K-DIN    | BBA            | -1.29 | 293.44 |
|             | CNOS+SS/Sulf   | -1.40 | 317.75 |
| 225K-IMF    | FreshSS+AgedSS | -0.89 | 204.49 |
| 230K-DIN    | Dust           | -1.42 | 328.27 |
|             | BBA            | -1.47 | 340.32 |
| 235K-DIN    | Dust           | -0.54 | 130.47 |

185  
186
